# Supplementary material for: Properties of aerosols and formation mechanisms over southern China during the monsoon season
Source: Copernicus journal article supplement (doi:10.5194/acp-2016-390), 2016-05-13

## Supplement of

### Properties of aerosols and formation mechanisms over southern China during the monsoon season

Weihua Chen, Xuemei Wang\*, Jason Blake Cohen, Shengzhen Zhou\*, Zhisheng Zhang, Ming Chang, Chuen Yu Chan

\*corresponding author: Xuemei Wang ([eeswxm@mail.sysu.edu.cn](mailto:eeswxm@mail.sysu.edu.cn)), Shengzhen Zhou([zszking@126.com](mailto:zszking@126.com))

#### Figures

**Figure S1** Time series of size-resolved aerosol compositions at the three sites

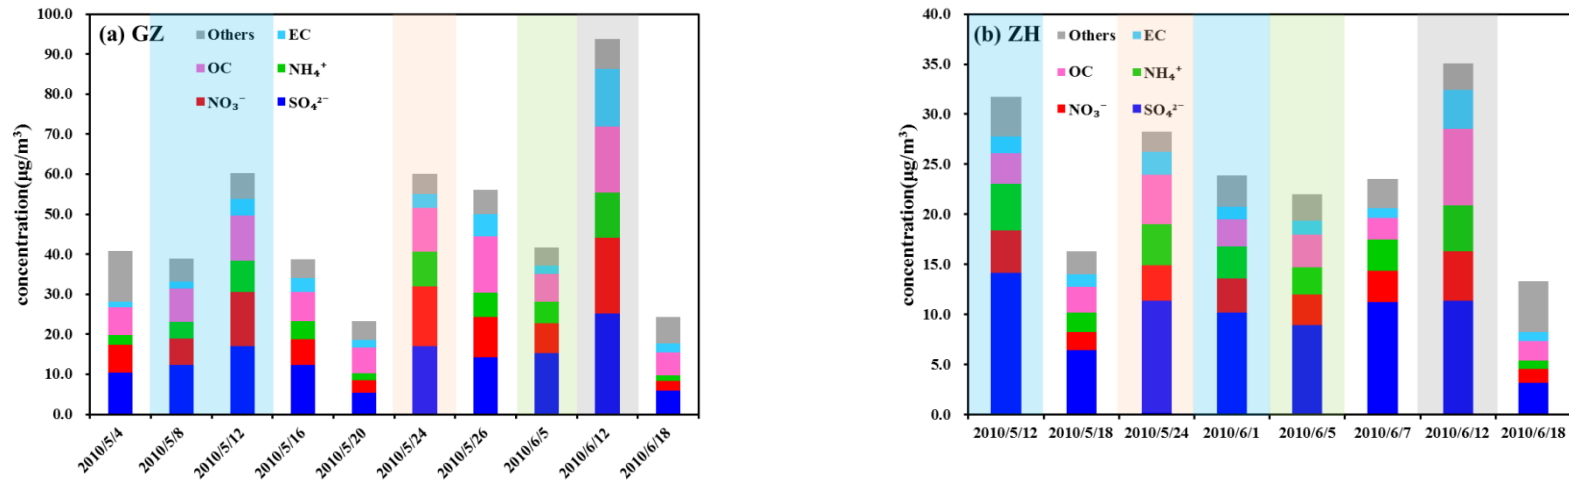

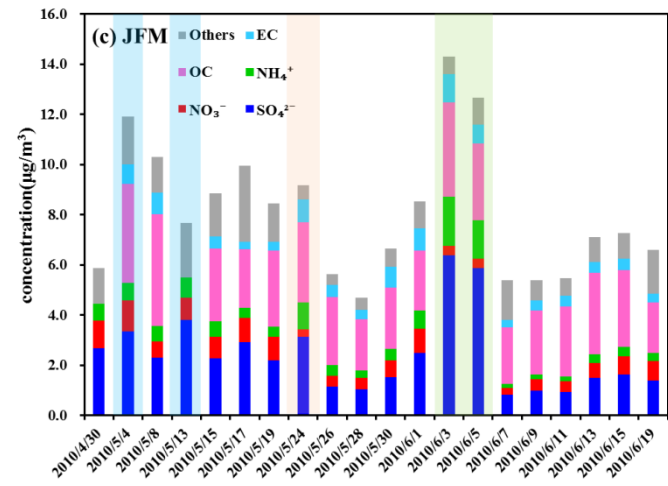

**Figure S2** Case study on 12<sup>th</sup> Jun. in GZ and ZH ((a) 72 h air mass backward trajectories in GZ, (b-c) 3D distribution of 24h air mass back trajectories on lower level (100, 300 and 500m) and on higher level (1000, 1500 and 2000m) in GZ; (d-e) West-east and North-south cross-section of the vertical distribution of the residence times at 23.12° and 113.36° E (just in GZ); (f-i) The mass size distribution of  $\text{NH}_4^+$ , OC, EC and  $\text{K}^+$  in GZ; (j)The mass size distribution of  $\text{NO}_3^-$  in ZH)

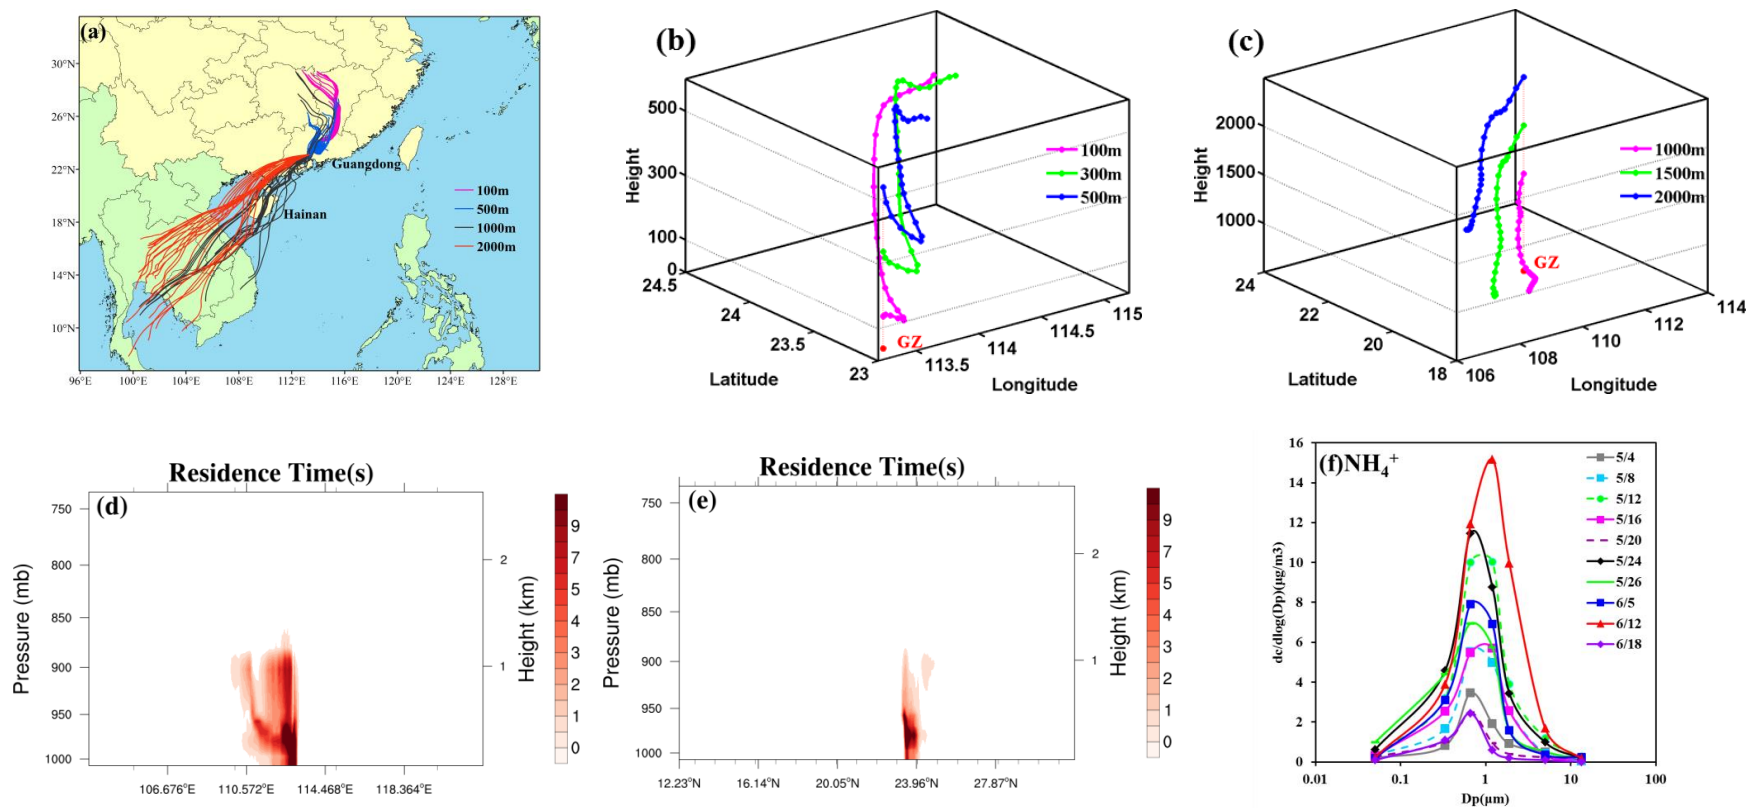

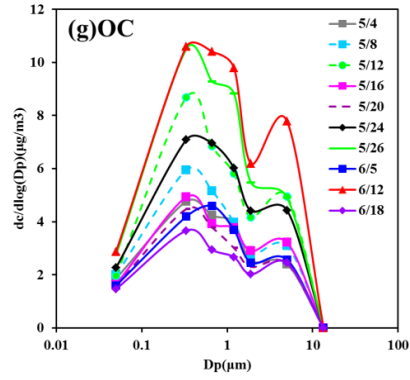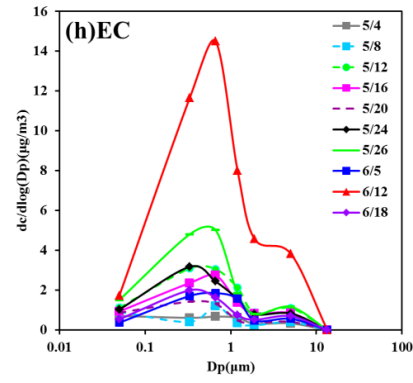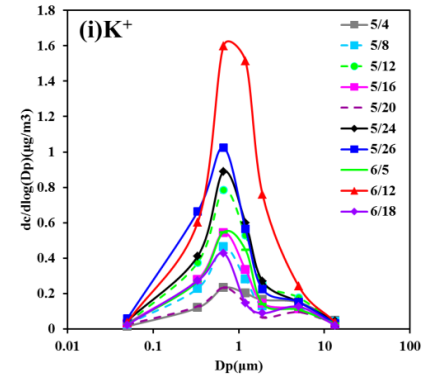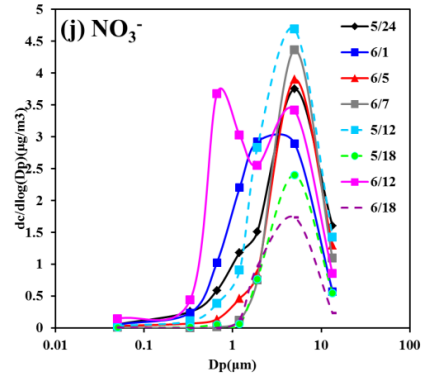

**Figure S3** Case study on 1<sup>st</sup>, 3<sup>rd</sup> and 5<sup>th</sup> Jun. in JFM ((a) 72 h air mass backward trajectories; (b-e) The mass size distribution of SO<sub>4</sub><sup>2-</sup>, NO<sub>3</sub><sup>-</sup>, NH<sub>4</sub><sup>+</sup>, OC, EC and K<sup>+</sup>)

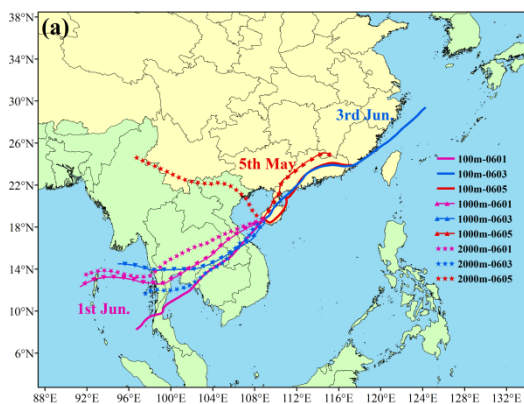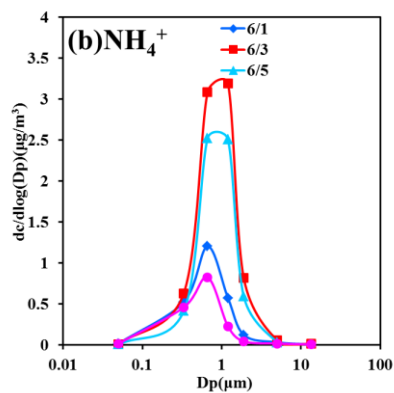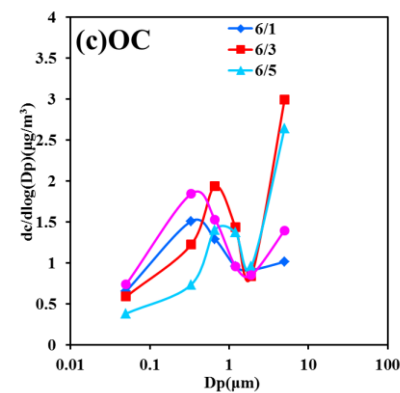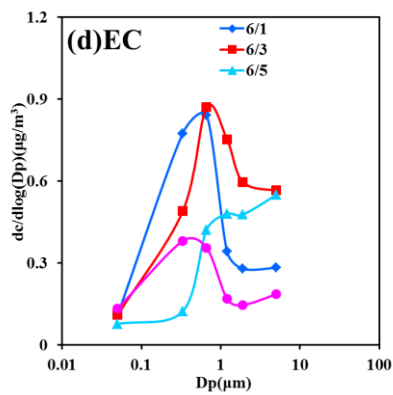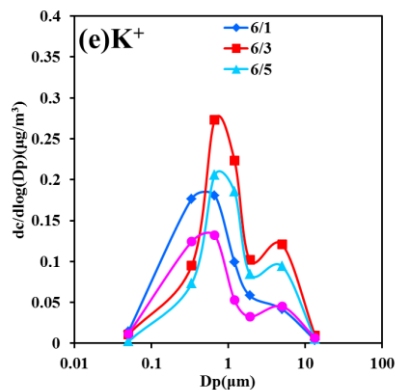

Supplement: Supplementary file 1 [file acp-2016-390-supplement.pdf]
